# Supplementary material for: A strategy to enhance the efficiency of dye-sensitized solar cells by the highly efficient TiO2/ZnS photoanode
Source: Royal Society of Chemistry journal article supplement (doi:10.1039/c4dt03102d), 2014-12-17
Supplement: c4dt03102d1.pdf [file c4dt03102d1.pdf]

## Supplementary Information

### **A strategy to enhance efficiency in dye-sensitized solar cells by highly efficient TiO<sub>2</sub>/ZnS photoanode**

**S. Srinivasa Rao,<sup>a</sup> Dinah Punnoose,<sup>a</sup> Ch. Venkata Tulasivarma,<sup>a</sup> CH.S.S.Pavan Kumar,<sup>b</sup>  
Chandu. V.V.M. Gopi,<sup>a</sup> Soo-Kyoung Kim,<sup>a</sup> and Hee-Je Kim<sup>a \*</sup>**

<sup>a</sup> School of Electrical Engineering, Pusan National University, San 30, Jangjeong-Dong,  
Gumjeong-Ku, Busan-609 735, South Korea.

<sup>b</sup> Research Center For Dielectric & Advanced Mater Physics, Pusan National University, San  
30, Jangjeong-Dong, Gumjeong-Ku, Busan-609 735, South Korea.

\*Corresponding Author. Tel: +82 51 510 2364. Fax: +82 51 513 0212. E-mail:

[heeje@pusan.ac.kr](mailto:heeje@pusan.ac.kr) (H.-J.K);

X-ray diffraction pattern was investigated to identify the crystallographic phase of CoS film which is shown in Fig. S1. The diffraction peaks appeared at  $2\theta = 30.62^\circ$ ,  $35.30^\circ$ ,  $54.44^\circ$ ,  $63.76^\circ$  and  $73.16^\circ$  assigned to the [1 0 0], [1 0 1], [1 1 0], [2 0 0] and [0 0 4] crystal planes of the hexagonal structure (JCPDS card No. 03-065-3418).

Fig. S2 shows the optimization of ZnS SILAR cycles on TiO<sub>2</sub> photoanode. The adhesion depends strongly on the rate of separation of the bond surfaces, deposition temperature and time etc.<sup>1</sup> In this study, development of adhesion and its strength with deposition time is not considered; care was taken to obtain adhesion through ZnS SILAR cycles on TiO<sub>2</sub>. We have observed strong adhesion between the substrate, photoanode and sensitizer until 4 SILAR cycles. Later on, the electrolyte was absorbed by the sensitized

photoanode from ZnS6 to ZnS8. As the SILAR cycles are increased, the material started to peel off from the substrate.

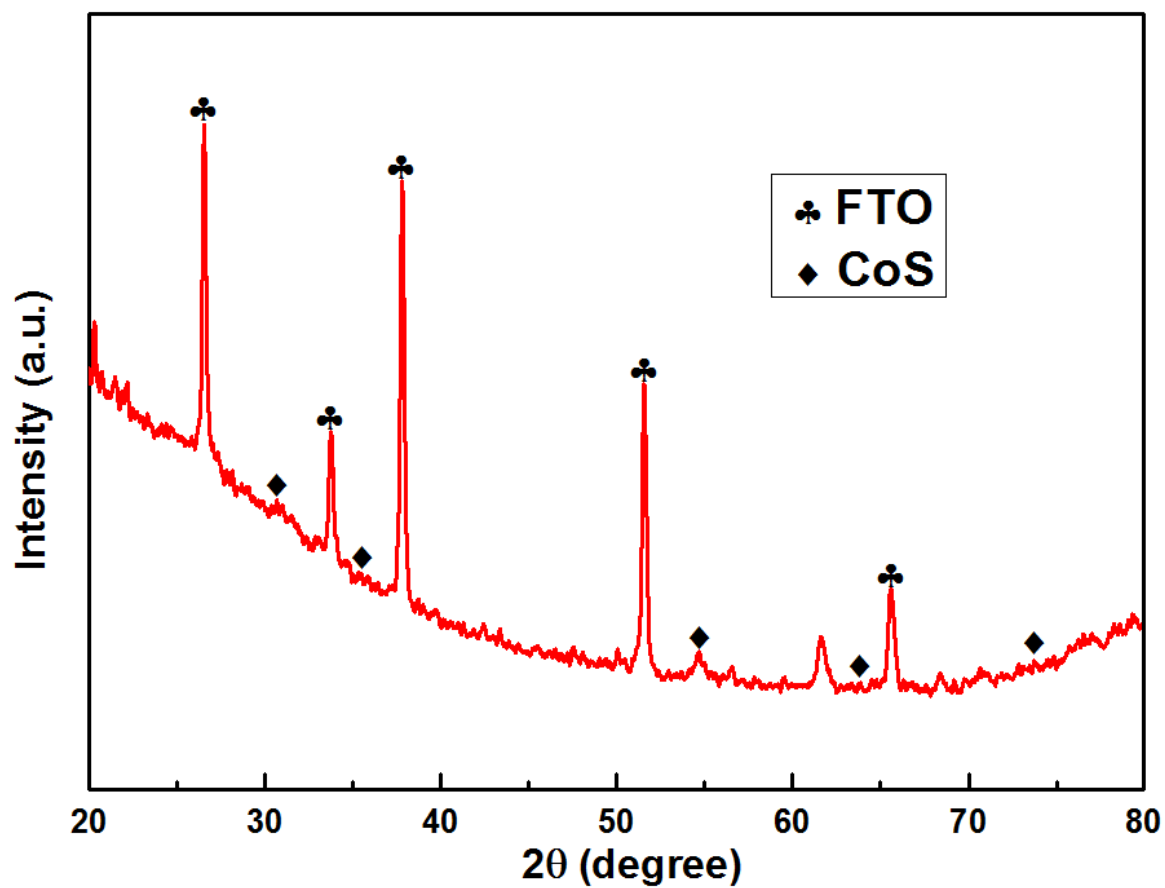

**Fig. S1.** X-ray diffraction results of CoS thin films on FTO substrate.

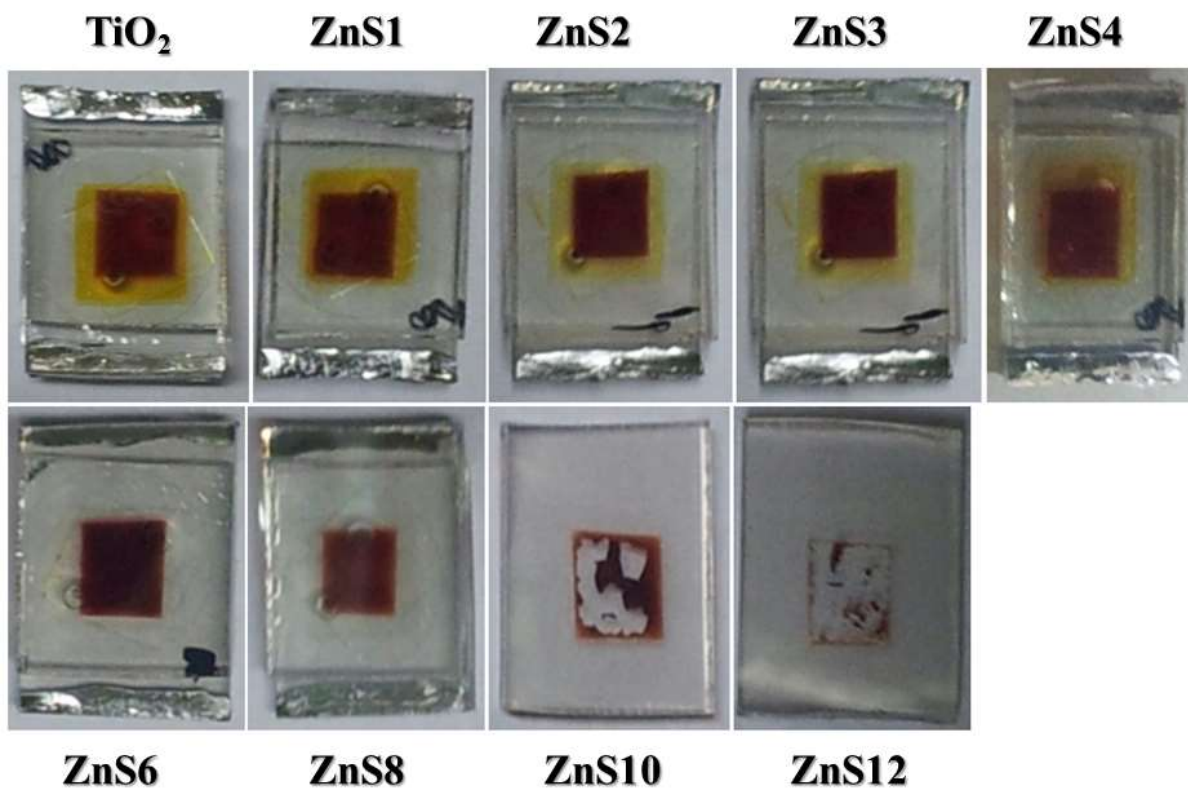

**Fig. S2.** Optimization of ZnS SILAR cycles on  $\text{TiO}_2$  electrode.

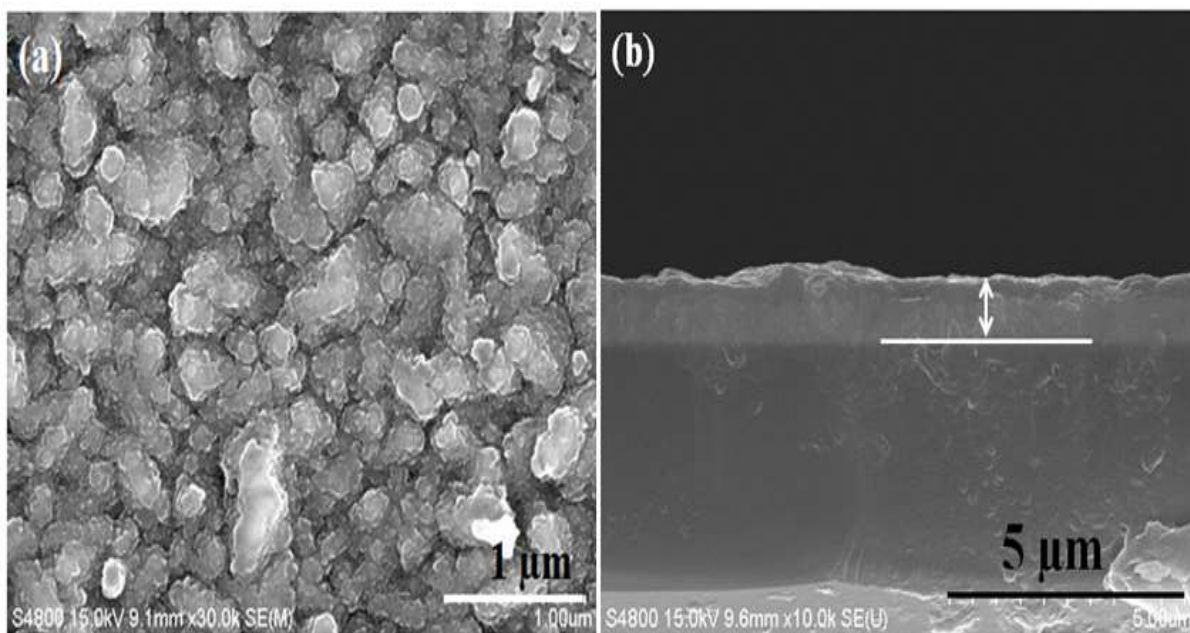

**Fig. S3.** SEM and cross sectional SEM images of the CoS thin film on FTO substrate.

FE-SEM and Cross sectional SEM images were conducted to identify the surface morphology and thickness of CoS thin films on FTO substrate and the resultant figures are shown in Fig. S3. Adhesion of material on FTO substrate plays a key role in determining the power conversion efficiency. When the deposition temperature was 80 °C for 2 h, the active material shows good adhesion to the substrate and hence long-term stability was observed in  $I^-/I_3^-$  electrolyte. The diameter of the CoS is approximately 157 nm. Fig. S3(a) shows a rough scale-like structure and accumulated nanoparticles, which renders it highly catalytically active in the CE. The thickness of the CoS film is about 1  $\mu\text{m}$  from SEM image cross section (Fig. S3(b)).

## References

1 A.N. Gent and R.P. Petrich, *Proc. Roy. Soc. A.* 1969, **310**, 433-448.
